# Supplementary material
Source: publisher figshare collection journal article supplement (https://future-science-group.figshare.com/ndownloader/files/31631291)
Supplement: Supplementary file 1 [file 31631291]

**Supplementary Table 1: Distribution of answers in C19P-S.**

|  | **Strongly disagree (1)** | | **Disagree (2)** | | **Agree (3)** | | **Generally agree (4)** | | **Strongly agree (5)** | |
| --- | --- | --- | --- | --- | --- | --- | --- | --- | --- | --- |
| **n** | **%** | **n** | **%** | **n** | **%** | **n** | **%** | **n** | **%** |
| The fear of coming down with coronavirus makes me very anxious | 51 | 17,0 | 21 | 7,0 | 53 | 17,7 | 36 | 12,0 | 139 | 46,3 |
| I experience stomach-aches out of the fear of coronavirus | 289 | 96,3 | 4 | 1,3 | 4 | 1,3 | 1 | 0,3 | 2 | 0,7 |
| After the coronavirus outbreak, I feel extremely anxious when I see people coughing | 32 | 10,7 | 26 | 8,7 | 38 | 12,7 | 40 | 13,3 | 164 | 54,7 |
| The possibility of food supply shortage due to the coronavirus pandemic causes me anxiety | 175 | 58,3 | 34 | 11,3 | 52 | 17,3 | 24 | 8,0 | 15 | 5,0 |
| I am extremely afraid that someone in my family might become infected by the coronavirus | 28 | 9,3 | 13 | 4,3 | 33 | 11,0 | 35 | 11,7 | 191 | 63,7 |
| I experience chest pain out of the fear of coronavirus | 274 | 91,3 | 10 | 3,3 | 9 | 3,0 | 3 | 1,0 | 4 | 1,3 |
| I actively avoid people I see sneezing after the coronavirus outbreak | 18 | 6,0 | 22 | 7,3 | 27 | 9,0 | 40 | 13,3 | 193 | 64,3 |
| The possibility of shortages in cleaning supplies due to the coronavirus epidemic makes me nervous. | 175 | 58,3 | 40 | 13,3 | 35 | 11,7 | 20 | 6,7 | 30 | 10,0 |
| The news of death due to coronavirus causes a great anxiety to me | 43 | 14,3 | 15 | 5,0 | 55 | 18,3 | 56 | 18,7 | 131 | 43,7 |
| I experience tremors due to the fear of coronavirus | 285 | 95,0 | 6 | 2,0 | 4 | 1,3 | 3 | 1,0 | 2 | 0,7 |
| Following the coronavirus pandemic, I have noticed that I spend extensive periods of time washing my hands | 5 | 1,7 | 3 | 1,0 | 18 | 6,0 | 35 | 11,7 | 239 | 79,7 |
| I stock on food for fear of coronavirus | 227 | 75,7 | 29 | 9,7 | 32 | 10,7 | 5 | 1,7 | 7 | 2,3 |
| The uncertainties surrounding the coronavirus worry me a lot. | 48 | 16,0 | 21 | 7,0 | 60 | 20,0 | 62 | 20,7 | 109 | 36,3 |
| I experience sleep problems out of the fear of coronavirus | 268 | 89,3 | 10 | 3,3 | 10 | 3,3 | 1 | 0,3 | 11 | 3,7 |
| The fear of coming down with coronavirus seriously impedes my social relationships | 8 | 2,7 | 5 | 1,7 | 23 | 7,7 | 48 | 16,0 | 216 | 72,0 |
| After the coronavirus pandemic, I do not feel relaxed unless I constantly check on my supplies at home | 242 | 80,7 | 40 | 13,3 | 12 | 4,0 | 3 | 1,0 | 3 | 1,0 |
| The speed with which the coronavirus is spreading is causing me a great panic | 22 | 7,3 | 28 | 9,3 | 48 | 16,0 | 60 | 20,0 | 142 | 47,3 |
| The coronavirus is making me so nervous that I find myself unable to do what I used to have no problem doing. | 101 | 33,7 | 34 | 11,3 | 71 | 23,7 | 55 | 18,3 | 39 | 13,0 |
| I can't control my anxiety about catching the coronavirus from others | 104 | 34,7 | 45 | 15,0 | 46 | 15,3 | 49 | 16,3 | 56 | 18,7 |
| I passionately argue with people I think are irresponsible in the face of the coronavirus | 14 | 4,7 | 12 | 4,0 | 33 | 11,0 | 74 | 24,7 | 167 | 55,7 |

***Table 3 can be added as supplementary material if tables have to be reduced.**
